# Supplementary material for: Monodisperse TiO2 mesoporous spheres with core–shell structure: candidate photoanode materials for enhanced efficiency dye sensitized solar cells
Source: Royal Society of Chemistry journal article supplement (doi:10.1039/c4ra01956c), 2014-01-01
Supplement: c4ra01956c1.pdf [file c4ra01956c1.pdf]

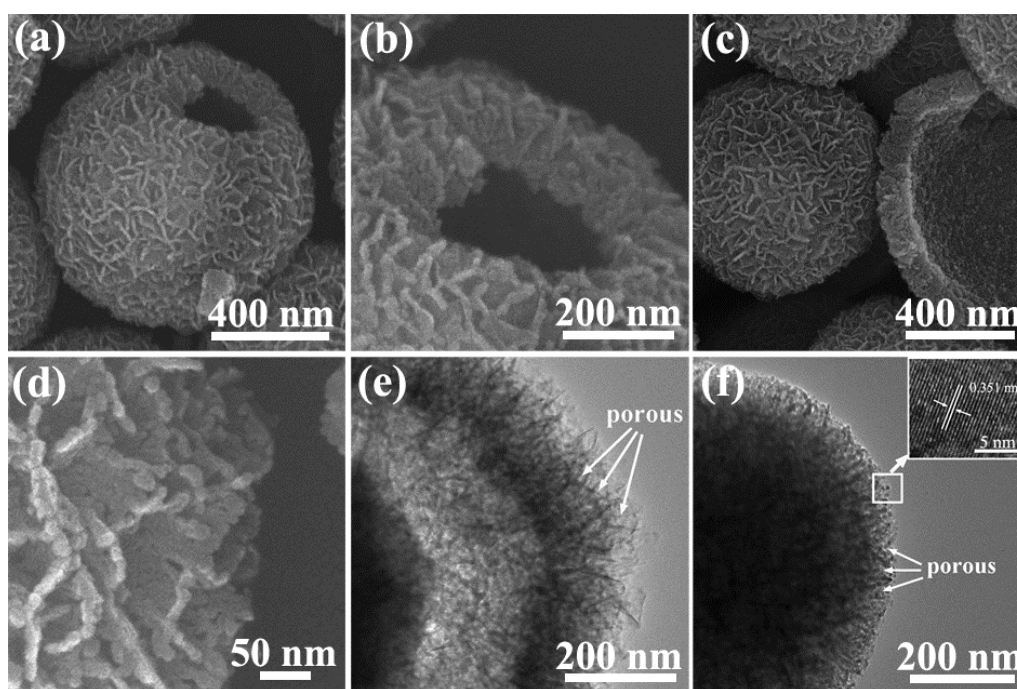

**Fig. S1** (a-d) SEM images of the hierarchical TiO<sub>2</sub> core-shell spheres with different magnifications, (e) TEM image of as-prepared core-shell spheres, (f) TEM and HRTEM (inset) images of T2.

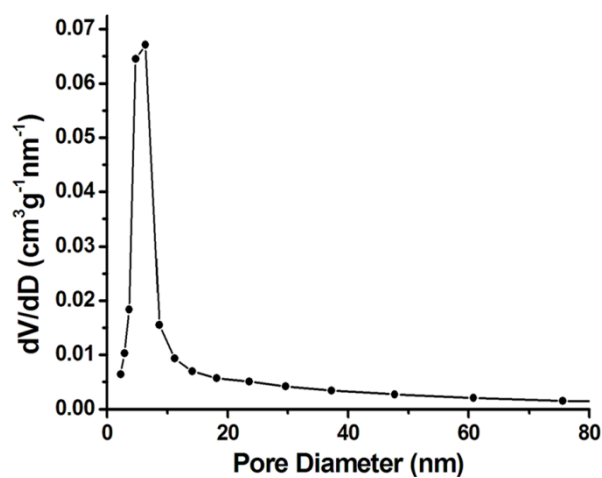

**Fig. S2** BJH pore size distribution plots of mesoporous core-shell structure T3.
